# Supplementary material for: Mono-, di- and polynuclear copper(II) compounds derived from N-butyldiethanolamine: structural features, magnetism and catalytic activity for the mild peroxidative oxidation of cyclohexane
Source: Royal Society of Chemistry journal article supplement (doi:10.1039/b813160k), 2009-01-01
Supplement: b813160k.pdf [file b813160k.pdf]

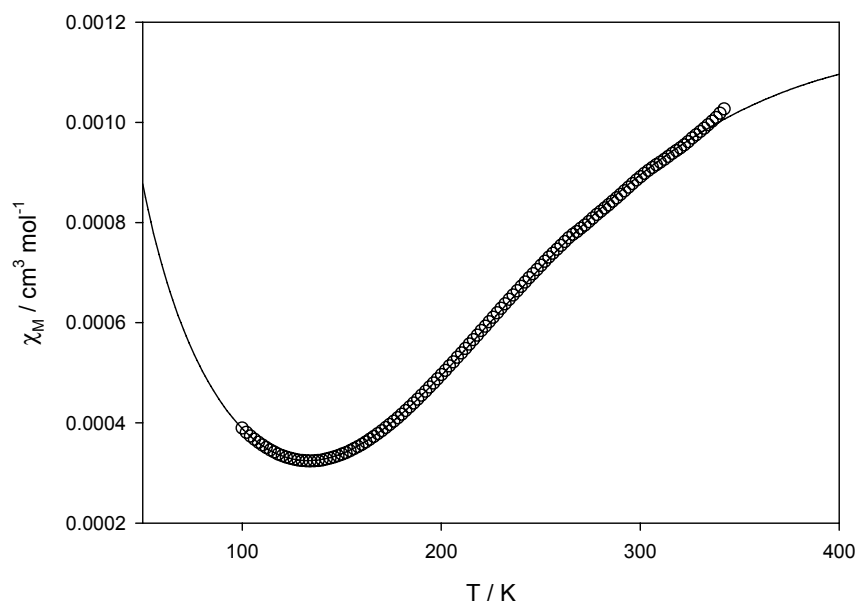

**Fig. S1** Thermal dependence of the molar magnetic susceptibility for compound **3**. The solid line is the best fit to the equation (1).

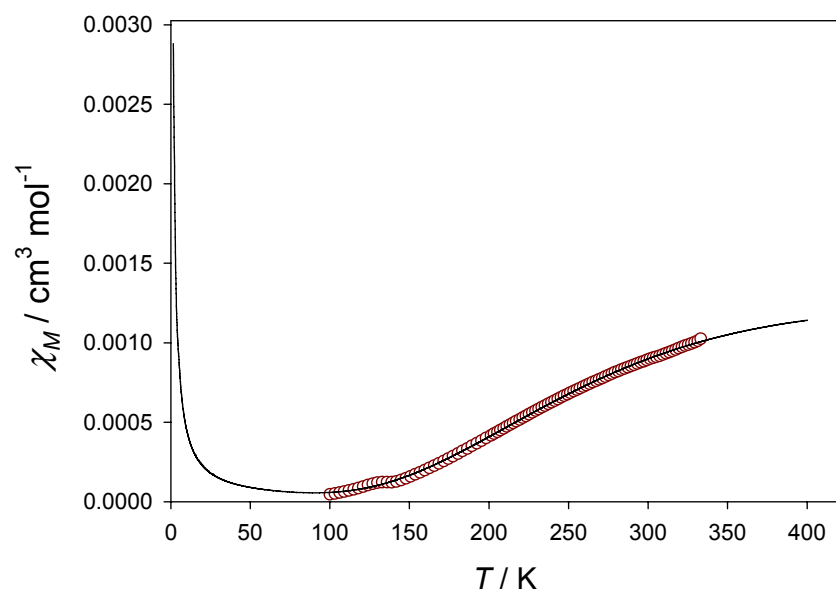

**Fig. S2** Thermal dependence of the molar magnetic susceptibility for compound **4**. The solid line is the best fit to the equation (1).
